# Supplementary material
Source: publisher site journal article supplement (https://www.dovepress.com/article/258812)
Supplement: Supplementary file 1 [file get_supplementary_file.php]

**Supplementary Table 1 The Process of Data Cleaning**

| Criteria | Number of included or excluded | Number of remained |
| --- | --- | --- |
| Including all randomly selected bacterial pneumonia patients admitted to the sample hospitals in 2015 | Of 3,072 observations are included | – |
| Excluding those patients with missing medical records or incorrect principal diagnosis | Of 793 observations are excluded | Of 2,279 observations are remained |
| Excluding those observations in the hospitals with missing value in competition measure | Of 112 observations are excluded | Our final dataset consists of 2,167 observations in 24 hospitals. |

**Supplementary Table 2 Variable Definitions**

| Variables | Definition |
| --- | --- |
| **Dependent variables** | |
| Oxygenation assessment | Patients who had an assessment of arterial oxygenation by arterial blood gas measurement or pulse oximetry within 24 hours prior to or after arrival at the hospital. |
| Antibiotic treatment | Patients receive antibiotics during hospitalization. |
| First antibiotic treatment within 6h | Patients who receive their first dose of antibiotics within 6 hours after arrival at the hospital. |
| **Mainly explanatory variable** | |
| Competition | 0 = Low, 1 = High |
| **Control variables** |  |
| Patient characteristics |  |
| Age | Age (year) |
| Hospital characteristics |  |
| Whether TCM | 0 = No, 1 = Yes |
| Whether tertiary | 0 = No, 1 = Yes |
| Whether first-class | 0 = No, 1 = Yes |
| Beds/100 | The actual open beds for a hospital (unit: 100 beds) |
| Nurses per 100 beds | The number of nurses per 100 beds for a hospital |
| Doctors per 100 beds | The number of doctors per 100 beds for a hospital |
| **Observations** | Sample size (*N*=2,167) |

**Abbreviation:** TCM, traditional Chinese medicine.
